# Supplementary material for: Utilizing Molecular Epidemiology and Citizen Science for the Surveillance of Lagoviruses in Australia
Source: MDPI journal article supplement (doi:10.3390/v15122348), 2023-11-29
Supplement: s1 [file s1]

## Supplementary Information

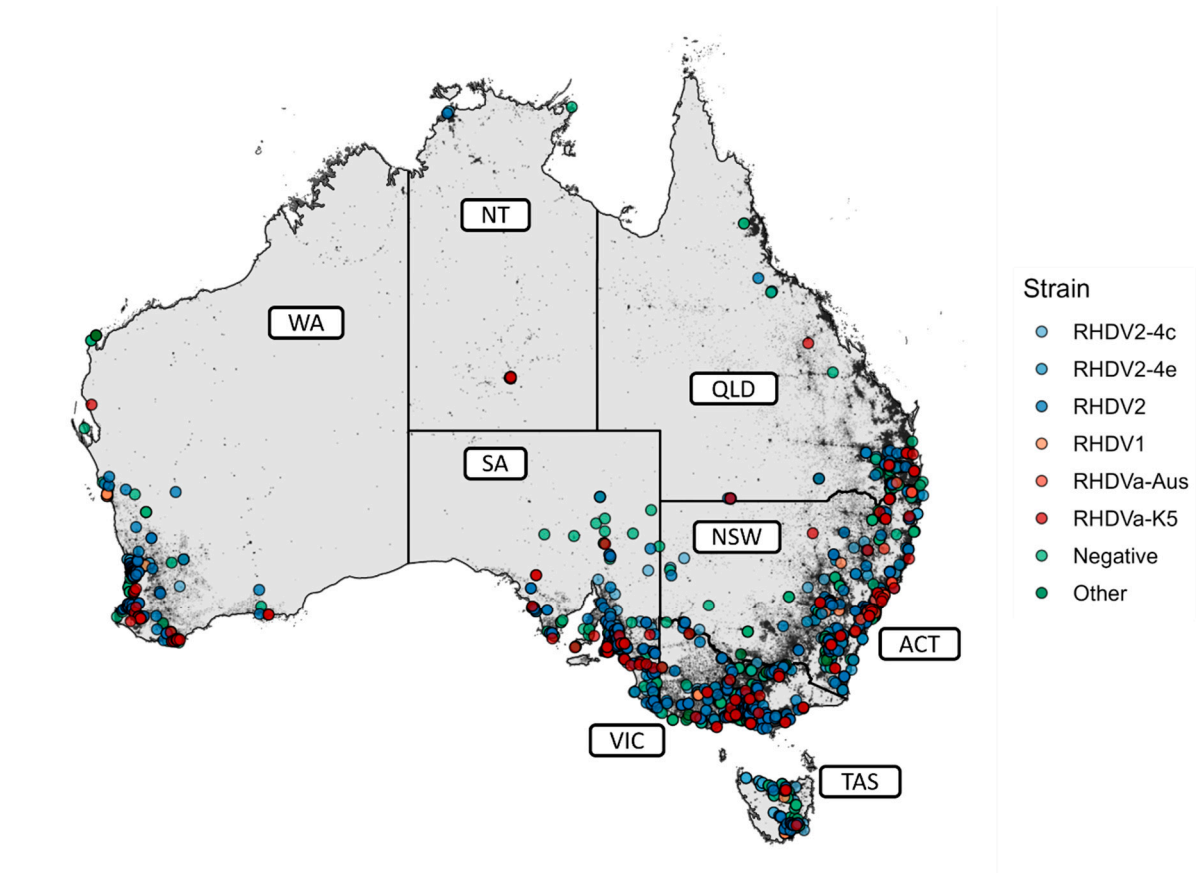

**FIG S1.** A geographical distribution of the human population and samples submitted for lagovirus testing from January 2015 to December 2022 in Australia. The human population distribution is depicted in dark grey and was determined based on the 2021–22 population data published by the Australian Bureau of Statistics [1]. Colours refer to the respective lagovirus variant that was detected. “Other” refers to samples that tested negative for RHDV but positive for Myxomavirus, Pasteurella or Eimeria. NSW – New South Wales, VIC – Victoria, QLD – Queensland, NT – Northern Territory, WA – Western Australia, SA – South Australia, ACT – Australian Capital Territory, TAS – Tasmania.

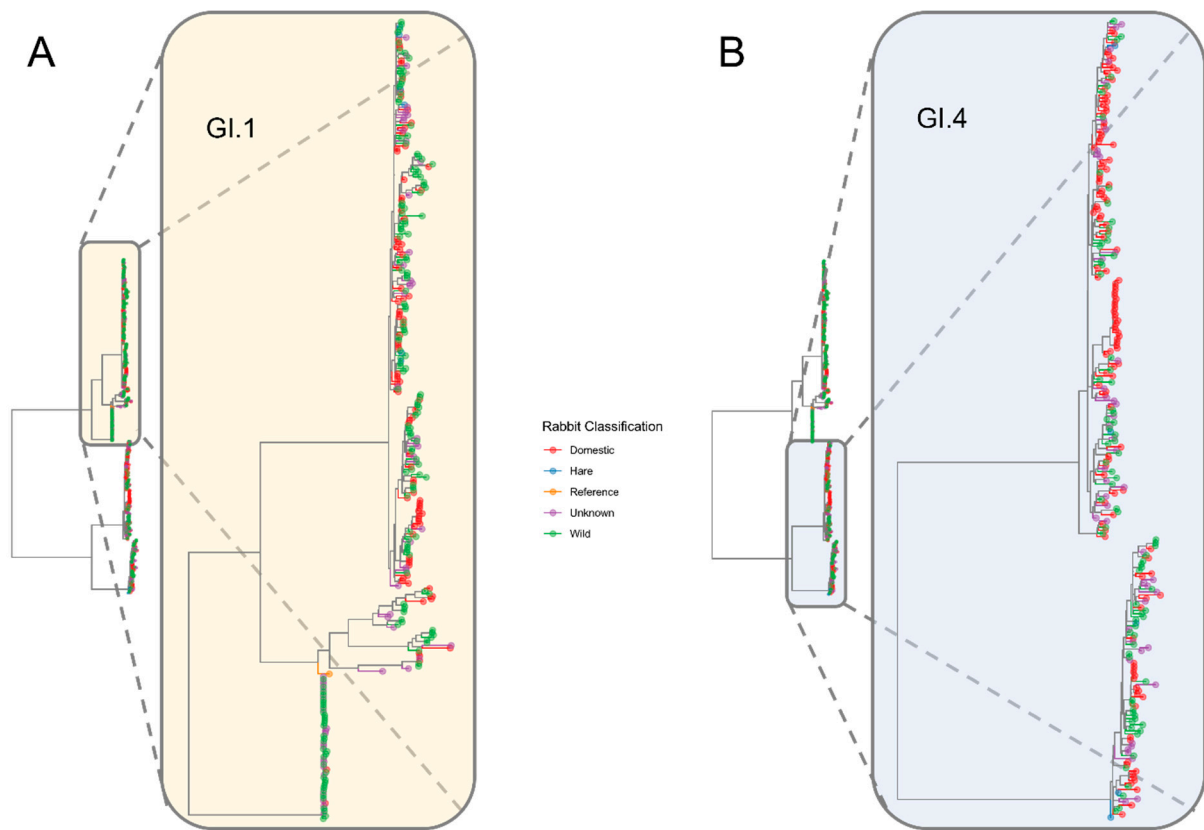

**FIG S2.** Organisation of RHDV isolates from different sources of leporid samples tested based on non-structural gene genotype. Samples included those obtained from domesticated rabbits (red), hares (blue), unknown (purple) and wild rabbits (green). The reference sequences for GI.1 and GI.4 are coloured in yellow. Respective genotypes are differentiated and highlighted: (A) GI.1 and (B) GI.4.

**Table S1:** PCR strategy for lagovirus amplification

| Fragment | Primer      | Sequence (5' to 3')                                              | Direction | Variant  | Position     | Reference  |
|----------|-------------|------------------------------------------------------------------|-----------|----------|--------------|------------|
| <b>1</b> | RHDV1       | GTGAAARTTATGSCGGCTATGTCGCGC                                      | Fwd       | RHDV2    | 1 – 27       | [49]       |
|          | RHDV2-1R    | TCCCTTGAGTACCTAACGAGCA                                           | Rev       | RHDV2    | 2765 - 2786  | This Study |
| <b>2</b> | RHDV2-2L    | GGAGTCACTGTCACAACGGT                                             | Fwd       | RHDV2    | 2479 - 2498  | This Study |
|          | RHDV2-4c-2R | TTTGCCCTCCATAACATTCACAAA                                         | Rev       | RHDV2    | 5293 - 5316  | This Study |
| <b>3</b> | RHDV2-3L    | GTTGTCAGGCTAGCCATTGACA                                           | Fwd       | RHDV2    | 4546 - 4567  | This Study |
|          | RHDVend     | TTTTTTTTTTTTTTTTTTTTTTTTTTTATA<br>GCTTACTTTAACTATAAACCCAATTAAACC | Rev       | RHDV2    | 7404 – polyA | [70]       |
|          |             |                                                                  |           |          |              |            |
| <b>1</b> | RHDV1       | GTGAAARTTATGSCGGCTATGTCGCGC                                      | Fwd       | RHDV2-4c | 1 – 27       | [49]       |
|          | RHDV2-4c-1R | TTGGGGTCGGTGAACACATCA                                            | Rev       | RHDV2-4c | 2825 - 2855  | This Study |
| <b>2</b> | RHDV2-4c-2L | TGGCATGTGATGAGCAACCC                                             | Fwd       | RHDV2-4c | 2623 - 2642  | This Study |
|          | RHDV2-4c-2R | TTTGCCCTCCATAACATTCACAAA                                         | Rev       | RHDV2-4c | 5293 - 5316  | This Study |
| <b>3</b> | RHDV2-4c-3L | CTTGCAATTGTTGTGAGCAAAC                                           | Fwd       | RHDV2-4c | 4570 - 4592  | This Study |
|          | RHDVend     | TTTTTTTTTTTTTTTTTTTTTTTTTTTATA<br>GCTTACTTTAACTATAAACCCAATTAAACC | Rev       | RHDV2-4c | 7404 – polyA | [70]       |
|          |             |                                                                  |           |          |              |            |
| <b>1</b> | RHDV1       | GTGAAARTTATGSCGGCTATGTCGCGC                                      | Fwd       | RHDV2-4e | 1 – 27       | [49]       |
|          | RHDV2-4e-1R | CTGACGAGTAAACCGCCACATG                                           | Rev       | RHDV2-4e | 2753 - 2774  | This Study |
| <b>2</b> | RHDV2-4e-2L | CAAACCACCCTCATTAACCCCT                                           | Fwd       | RHDV2-4e | 2524 - 2545  | This Study |
|          | RHDV2-4c-2R | TTTGCCCTCCATAACATTCACAAA                                         | Rev       | RHDV2-4e | 5293 - 5316  | This Study |
| <b>3</b> | RHDV2-4e-3L | AGTCACATCCTATGACCATCCTTG                                         | Fwd       | RHDV2-4e | 4625 - 4648  | This Study |
|          | RHDVend     | TTTTTTTTTTTTTTTTTTTTTTTTTTTATA<br>GCTTACTTTAACTATAAACCCAATTAAACC | Rev       | RHDV2-4e | 7404 – polyA | [70]       |
|          |             |                                                                  |           |          |              |            |
| <b>1</b> | RHDV1       | GTGAAARTTATGSCGGCTATGTCGCGC                                      | Fwd       | RHDVa-K5 | 1 – 27       | [49]       |

|   |         |                                                                 |     |          |              |            |
|---|---------|-----------------------------------------------------------------|-----|----------|--------------|------------|
|   | K5_4_R  | GCGATCCTGTGAACCAAGTGAG                                          | Rev | RHDVa-K5 | 1595 - 1616  | This Study |
| 2 | K5_5_L  | TGGTCCTTGGGAAAATCAACATGA                                        | Fwd | RHDVa-K5 | 1511 - 1534  | This Study |
|   | RHDV6   | GCCATRGTYGCAAGRRTTGACAAGGTGG                                    | Rev | RHDVa-K5 | 2928 - 2954  | [49]       |
| 3 | RHDV7   | GTAYTCAAGRGACCCTGTCCCCGTGG                                      | Fwd | RHDVa-K5 | 2775 - 2800  | [49]       |
|   | RHDV10  | CATCATCGGRGTCATGGCATAACAGGCC                                    | Rev | RHDVa-K5 | 4828 - 4854  | [49]       |
| 4 | RHDV11  | CACCCCATGACYATACTTGACGCCATG                                     | Fwd | RHDVa-K5 | 4630 - 4656  | [49]       |
|   | K5_16_R | ATGGTCAATGTCAGCAAACCGG                                          | Rev | RHDVa-K5 | 6174 - 6195  | This Study |
| 5 | K5_17_L | CCAAATAGTGGGACTGCAACCA                                          | Fwd | RHDVa-K5 | 6081 - 6102  | This Study |
|   | RHDVend | TTTTTTTTTTTTTTTTTTTTTTTTTTATAGC<br>TTACTTTAACTATAAACCCAATTAAACC | Rev | RHDVa-K5 | 7404 – polyA | [70]       |

**Table S2:** PrimalScheme PCR strategy for lagovirus amplification

| Fragment | Primer    | Sequence (5' to 3')         | Direction | Variant  | Position    | Reference  |
|----------|-----------|-----------------------------|-----------|----------|-------------|------------|
| 1        | RHDV1     | GTGAAARTTATGSCGGCTATGTCGCGC | Fwd       | RHDV2-4e | 1 – 27      | [49]       |
|          | Rec4e_1_R | GGCTCCAAGTTCAGTGAACAGG      | Rev       |          | 453 - 474   | This Study |
| 2        | Rec4e_2_L | GGCACTGAACAAAGTCATCCCTT     | Fwd       |          | 372 - 394   | This Study |
|          | Rec4e_2_R | TTGACAACATCGTCGTCGTGTC      | Rev       |          | 874 - 895   | This Study |
| 3        | Rec4e_3_L | AAAGTTGTTCATGGCGCATCGA      | Fwd       |          | 784 - 805   | This Study |
|          | Rec4e_3_R | CACCAATCACACCTGCAAAGGT      | Rev       |          | 1240 - 1261 | This Study |
| 4        | Rec4e_4_L | GGCCTTCGTTTTCTCCACCATT      | Fwd       |          | 1155 - 1176 | This Study |
|          | Rec4e_4_R | GAGTCAAAGTGGTCAAGGCCAA      | Rev       |          | 1655 - 1676 | This Study |
| 5        | Rec4e_5_L | CCGGTGTGGGTAAAACATACTTGG    | Fwd       |          | 1580 - 1603 | This Study |
|          | Rec4e_5_R | AAAAACAAACCCAGGAGCAGGC      | Rev       |          | 2037 - 2058 | This Study |
| 6        | Rec4e_6_L | GCCGTTGAAAGTTGGCAAGCTA      | Fwd       |          | 1933 - 1954 | This Study |
|          | Rec4e_6_R | ACACCCTCAACACCGTTCACTA      | Rev       |          | 2462 - 2483 | This Study |
| 7        | Rec4e_7_L | CAGTTTGTACTGGGCTGTGTGA      | Fwd       |          | 2389 - 2410 | This Study |
|          | Rec4e_7_R | AGTGTGCTATCTGCCTCCAAC       | Rev       |          | 2872 - 2893 | This Study |

|           |            |                               |     |          |             |            |
|-----------|------------|-------------------------------|-----|----------|-------------|------------|
| <b>8</b>  | Rec4e_8_L  | CCCACCGCGTCTGATAATGTTG        | Fwd |          | 2794 - 2815 | This Study |
|           | Rec4e_8_R  | CGTCAAGTGTCTTGCCTCCTTT        | Rev |          | 3283 - 3304 | This Study |
| <b>9</b>  | Rec4e_9_L  | GAGGACCAAGTGACCATTGTCTG       | Fwd |          | 3208 - 3229 | This Study |
|           | Rec4e_9_R  | AGCTTGCCTGTGTGTATTGCAA        | Rev |          | 3680 - 3701 | This Study |
| <b>10</b> | Rec4e_10_L | AGATGTGCTGGCATATGACGGT        | Fwd |          | 3597 - 3618 | This Study |
|           | Rec4e_10_R | CTTGAAGGGCAGGTTCTCTTGC        | Rev |          | 4083 - 4104 | This Study |
| <b>11</b> | Rec4e_11_L | TTAGACAAAGTTGATGAGTTCATAGAACG | Fwd |          | 4003 - 4031 | This Study |
|           | Rec4e_11_R | ACACAAAAAGTCACCAGCCTTTGA      | Rev |          | 4483 - 4506 | This Study |
| <b>12</b> | Rec4e_12_L | CTAGGTTTGGGCCAATTGCAGT        | Fwd |          | 4409 - 4430 | This Study |
|           | Rec4e_12_R | TGGCAGGCAACAACTAACCAT         | Rev |          | 4852 - 4873 | This Study |
| <b>13</b> | Rec4e_13_L | GGCCTTCACTGTTCAAACCTGT        | Fwd |          | 4771 - 4792 | This Study |
|           | Rec4e_13_R | CGACACGTTTACGATCTGCCAA        | Rev |          | 5248 - 5269 | This Study |
| <b>14</b> | Rec4e_14_L | ATCAAGCCAGAACTAGAACGTCAA      | Fwd |          | 5173 - 5196 | This Study |
|           | Rec4e_14_R | ACCCAGCGACTATAAACCGGAA        | Rev |          | 5659 - 5680 | This Study |
|           |            |                               |     |          |             |            |
| <b>1</b>  | RHDV1      | GTGAAARTTATGSCGGCTATGTCGCGC   | Fwd | RHDV2-4c | 1 – 27      | [49]       |
|           | Rec4c_1_R  | CATCAGCTTCCTGCCTTCATCC        | Rev |          | 510 -531    | This Study |
| <b>2</b>  | Rec4c_2_L  | TTTGAAGGCGAAGTTGACGACC        | Fwd |          | 433 -454    | This Study |
|           | Rec4c_2_R  | GCAAGAAGGTTGACGGGTTTGA        | Rev |          | 899 -920    | This Study |
| <b>3</b>  | Rec4c_3_L  | TTGACCCTCTGAAAACCTTGC         | Fwd |          | 812 -833    | This Study |
|           | Rec4c_3_R  | AAGTCTTTTGCCACCATGTGCT        | Rev |          | 1292 -1313  | This Study |
| <b>4</b>  | Rec4c_4_L  | GAAAGGGGCTGGAAAACTCACC        | Fwd |          | 1218 -1239  | This Study |
|           | Rec4c_4_R  | CCCGTGACGAGTCAAAATGGT         | Rev |          | 1664 -1685  | This Study |
| <b>5</b>  | Rec4c_5_L  | GGCGTTGGCAAAACATACTTGG        | Fwd |          | 1582 -1603  | This Study |
|           | Rec4c_5_R  | CCTGGGTGCAACTTGTGTCTTT        | Rev |          | 2076 -2097  | This Study |
| <b>6</b>  | Rec4c_6_L  | CATGTCCCATCTCACTTTCTTGGT      | Fwd |          | 1998 -2021  | This Study |
|           | Rec4c_6_R  | GCAAGATGTTGTCCACGGTTGT        | Rev |          | 2491 -2512  | This Study |

|           |            |                           |     |                                 |             |            |
|-----------|------------|---------------------------|-----|---------------------------------|-------------|------------|
| <b>7</b>  | Rec4c_7_L  | GTGAACATGACAAACCAACTCGG   | Fwd |                                 | 2407 -2429  | This Study |
|           | Rec4c_7_R  | ACAAACAGGTGTGCAATCTGCC    | Rev |                                 | 2879 -2900  | This Study |
| <b>8</b>  | Rec4c_8_L  | TATCTGACAACGTAGACCGGGG    | Fwd |                                 | 2801 -2822  | This Study |
|           | Rec4c_8_R  | TCAAGTGTCTTGCCTCCCTTTG    | Rev |                                 | 3281 -3302  | This Study |
| <b>9</b>  | Rec4c_9_L  | TTGAGACCTGACGAGGACCAAG    | Fwd |                                 | 3196 -3217  | This Study |
|           | Rec4c_9_R  | ACTCATCGTACAACGGCAAACC    | Rev |                                 | 3646 -3667  | This Study |
| <b>10</b> | Rec4c_10_L | AGAAGACATTGTCAGACTCAACCAA | Fwd |                                 | 3569 -3593  | This Study |
|           | Rec4c_10_R | TGCAGCACGCTCGATAAATTCA    | Rev |                                 | 4017 -4038  | This Study |
| <b>11</b> | Rec4c_11_L | ACTGCACGCTGATGAACATAGC    | Fwd |                                 | 3944 -3965  | This Study |
|           | Rec4c_11_R | ACTGCAATTGGTCCAAACCTGG    | Rev |                                 | 4409 -4430  | This Study |
| <b>12</b> | Rec4c_12_L | GTTACTCTGGGGTTGTGACGTG    | Fwd |                                 | 4326 -4347  | This Study |
|           | Rec4c_12_R | ACTCCATCATCACCGTACGTGT    | Rev |                                 | 4811 -4832  | This Study |
| <b>13</b> | Rec4c_13_L | GGTTACTTTGGTCAGCAGCAGT    | Fwd |                                 | 4727 -4748  | This Study |
|           | Rec4c_13_R | AACCTTCGTGTAAGCCTGCTGAC   | Rev |                                 | 5192 -5213  | This Study |
| <b>14</b> | Rec4c_14_L | ACGGCACATGACACTTGAAGAG    | Fwd |                                 | 5061 -5082  | This Study |
|           | Rec4c_14_R | GCGTCTGCAACTGACCATGTAA    | Rev |                                 | 5537 -5558  | This Study |
|           |            |                           |     |                                 |             |            |
| <b>15</b> | RHDV2_15_L | CCTGGTGTGTGGCCACTACTA     | Fwd | RHDV2,<br>RHDV2-4e,<br>RHDV2-4c | 5398 - 5419 | This Study |
|           | RHDV2_15_R | TTGTAAACGCTCAGGACCAACG    | Rev |                                 | 5870 - 5891 | This Study |
| <b>16</b> | RHDV2_16_L | CGAACCAGTCACCATCACCATG    | Fwd |                                 | 5793 - 5814 | This Study |
|           | RHDV2_16_R | CTGGAGCAATTTGGGAGATGGG    | Rev |                                 | 6283 - 6304 | [19]       |
| <b>17</b> | RHDV2_17_L | GCAAGTTTCCCTGGAAGCAGTT    | Fwd |                                 | 6208 - 6229 | This Study |
|           | RHDV2_17_R | GCGAACATGATGGGTGTGTTCT    | Rev |                                 | 6674 - 6695 | This Study |
| <b>18</b> | RHDV2_18_L | CACCCCAAACAGTAGTGCCATT    | Fwd |                                 | 6585 - 6606 | This Study |
|           | RHDV2_18_R | CCTGCAAGTCCAAGTCCAACAA    | Rev |                                 | 7047 - 7068 | This Study |
| <b>19</b> | RHDV2_19_L | AACCACCCTCATTGATCTGTCAGA  | Fwd |                                 | 6927 - 6950 | This Study |

|  |         |                                                                 |     |  |              |      |
|--|---------|-----------------------------------------------------------------|-----|--|--------------|------|
|  | RHDVend | TTTTTTTTTTTTTTTTTTTTTTTTTATAG<br>CTTACTTTAAACTATAAACCCAATTAAACC | Rev |  | 7404 – polyA | [70] |
|--|---------|-----------------------------------------------------------------|-----|--|--------------|------|

19. Mahar, J.E.; Jenckel, M.; Huang, N.; Smertina, E.; Holmes, E.C.; Strive, T.; Hall, R.N. Frequent intergenotypic recombination between the non-structural and structural genes is a major driver of epidemiological fitness in caliciviruses. *Virus Evol.* 2021, 7, veab080. <https://doi.org/10.1093/ve/veab080>.
44. Statistics, A.B.O. National, state and territory population. . Available online: <https://www.abs.gov.au/statistics/people/population/national-state-and-territory-population/sep-2022> (accessed on September 30).
49. Elsworth, P.; Cooke, B.D.; Kovaliski, J.; Sinclair, R.; Holmes, E.C.; Strive, T. Increased virulence of rabbit haemorrhagic disease virus associated with genetic resistance in wild Australian rabbits (*Oryctolagus cuniculus*). *Virology* **2014**, 464-465, 415-423, doi:10.1016/j.virol.2014.06.037.
70. Hall, R.N.; Capucci, L.; Matthaei, M.; Esposito, S.; Kerr, P.J.; Frese, M.; Strive, T. An in vivo system for directed experimental evolution of rabbit haemorrhagic disease virus. *PLoS One* **2017**, 12, e0173727-e0173727, doi:10.1371/journal.pone.0173727.
